# Supplementary material for: Genetics architecture of spontaneous coronary artery dissection in an Italian cohort
Source: PubMed Central journal article supplement (PMC11625805; doi:10.3389/fcvm.2024.1486273), 2024-11-25

## Supplementary Material

**Table S1.** Clinical onset, angiographic characteristic and management of SCAD event

|                                                                                                                                                                                                                                                                                                                                                                                                                                                                                              |           |
|----------------------------------------------------------------------------------------------------------------------------------------------------------------------------------------------------------------------------------------------------------------------------------------------------------------------------------------------------------------------------------------------------------------------------------------------------------------------------------------------|-----------|
| <b>Clinical onset n (%)</b>                                                                                                                                                                                                                                                                                                                                                                                                                                                                  |           |
| STEMI                                                                                                                                                                                                                                                                                                                                                                                                                                                                                        | 12 (80)   |
| NSTEMI                                                                                                                                                                                                                                                                                                                                                                                                                                                                                       | 3 (20)    |
| <b>Angiographic characteristic n (%)</b>                                                                                                                                                                                                                                                                                                                                                                                                                                                     |           |
| Tortuosity                                                                                                                                                                                                                                                                                                                                                                                                                                                                                   | 5 (33,3)  |
| TIMI 0                                                                                                                                                                                                                                                                                                                                                                                                                                                                                       | 3 (20)    |
| TIMI 1                                                                                                                                                                                                                                                                                                                                                                                                                                                                                       | 1 (6,66)  |
| TIMI 2                                                                                                                                                                                                                                                                                                                                                                                                                                                                                       | 1 (6,66)  |
| TIMI 3                                                                                                                                                                                                                                                                                                                                                                                                                                                                                       | 10 (66,6) |
| <b>Location of SCAD event</b>                                                                                                                                                                                                                                                                                                                                                                                                                                                                |           |
| LAD                                                                                                                                                                                                                                                                                                                                                                                                                                                                                          | 11 (73,3) |
| OM                                                                                                                                                                                                                                                                                                                                                                                                                                                                                           | -         |
| RCA                                                                                                                                                                                                                                                                                                                                                                                                                                                                                          | 3 (20)    |
| PDA                                                                                                                                                                                                                                                                                                                                                                                                                                                                                          | 3 (20)    |
| RPL                                                                                                                                                                                                                                                                                                                                                                                                                                                                                          | 1 (6,66)  |
| D1                                                                                                                                                                                                                                                                                                                                                                                                                                                                                           | -         |
| D2                                                                                                                                                                                                                                                                                                                                                                                                                                                                                           | 1 (6,66)  |
| D3                                                                                                                                                                                                                                                                                                                                                                                                                                                                                           | -         |
| LCx                                                                                                                                                                                                                                                                                                                                                                                                                                                                                          | 1 (6,66)  |
| <b>Management n (%)</b>                                                                                                                                                                                                                                                                                                                                                                                                                                                                      |           |
| PCI management                                                                                                                                                                                                                                                                                                                                                                                                                                                                               | 3 (20)    |
| Conservative management                                                                                                                                                                                                                                                                                                                                                                                                                                                                      | 12 (80)   |
| <b>Antiplatelet strategy n (%)</b>                                                                                                                                                                                                                                                                                                                                                                                                                                                           |           |
| SAPT                                                                                                                                                                                                                                                                                                                                                                                                                                                                                         | 5 (33,3)  |
| DAPT                                                                                                                                                                                                                                                                                                                                                                                                                                                                                         | 10 (66,6) |
| <b>Antiplatelet therapy n (%)</b>                                                                                                                                                                                                                                                                                                                                                                                                                                                            |           |
| Cardioaspirin                                                                                                                                                                                                                                                                                                                                                                                                                                                                                | 14 (93,3) |
| Ticagrelor                                                                                                                                                                                                                                                                                                                                                                                                                                                                                   | 4 (26,6)  |
| Clopidogrel                                                                                                                                                                                                                                                                                                                                                                                                                                                                                  | 6 (40)    |
| Prasugrel                                                                                                                                                                                                                                                                                                                                                                                                                                                                                    | 1 (6,66)  |
| STEMI:ST elevation myocardial infarction<br>NSTEMI: non ST-segment elevation myocardial infarction<br>LAD: left anterior descending artery<br>OM:obtuse marginal<br>PCI: percutaneous coronary intervention<br>RCA: right coronary artery<br>PDA: posterior descending artery<br>RPL: right posterolateral<br>D1:1st Diagonal<br>D2: 2nd Diagonal<br>D3: 3rd Diagonal<br>TIMI: Thrombolysis In Myocardial Infarction<br>SAPT: Single antiplatelet therapy<br>DAPT: Dual antiplatelet therapy |           |

**Table S2.** Description of variants of uncertain significance (VUS) in genes both previously associated with SCAD and CTDs identified in our cohort.

| Case ID | Gene     | Nucleotide variant           | Amino acid variant    | Family study | Disease inheritance | GnomAD v4.1 MAF |
|---------|----------|------------------------------|-----------------------|--------------|---------------------|-----------------|
| 1       | ABCC6    | NM_001171.6:<br>c.167A>G     | p.(His56Arg)          | NA           | AD/AR               | 0.00008552      |
| 2       | EMILIN1  | NM_007046.4:<br>c.920C>T     | p.(Ala307Val)         | NA           | AR                  | 0.000003223     |
| 2       | COL12A1  | NM_004370.6:<br>c.5467G>A    | p.(Val1823Ile)        | NA           | AD/AR               | 0.0002945       |
| 2       | COL1A2   | NM_000089.4:<br>c.670C>T     | p.(Arg224Cys)         | NA           | AD/AR               | 0.000001859     |
| 2       | ADAMTS10 | NM_001009944.2:<br>c.1910C>T | p.(Ala637Val)         | NA           | AD                  | 0               |
| 3       | COL11A2  | NM_080680.3:<br>c.889G>C     | p.(Gly297Arg)         | NA           | AD/AR               | 0.000007735     |
| 3       | MYH11    | NM_002474.3:<br>c.5392C>T    | P.(Arg1798Trp)        | NA           | AD                  | 0.00001983      |
| 5       | ATP6V0A2 | NM_012463.4:<br>c.2175+5del. | p.?                   | NA           | AR                  | 0.000003718     |
| 6       | ABCC6    | NM_0011715.6:<br>c.4015C>T   | p.(Arg1339Cys)        | Not M**      | AR                  | 0.00004778      |
| 6       | PKD1     | NM_001009944.3:<br>c.2081C>T | p.(Pro694Leu)         | M            | AD                  | 0.01971         |
| 6       | ADAMTSL4 | NM_019032.6:<br>c.232C>T     | p.(Leu78Phe)          | Not M**      | AR                  | 0.0002163       |
| 7       | PLOD1    | NM_000302.4:<br>c.1172A>G    | p.(Asn438Ser)         | F            | AR                  | 0.0001137       |
| 7       | COL2A1   | NM_001844.5:<br>c.3659T>C    | p.(Met1220Thr)        | F            | AD                  | 0.000003113     |
| 7       | FLNB     | NM_001457.4:<br>c.2237A>C    | p.(Lys746Thr)         | F            | AD/AR               | 0.00001549      |
| 8-15*   | COL5A1   | NM_000093.4:<br>c.700T>C     | p.(Tyr234His)         | M            | AD                  | 0.000055669     |
| 8-15*   | MTHFR    | NM_005957.5:<br>c.*2809T>C   | P.?                   | M            | AD/AR               | 0.00001156      |
| 8-15*   | COL5A2   | NM_000393.5:<br>c.4354-21C>T | p.?                   | F            | AD                  | 0.000003099     |
| 8       | ALDH18A1 | NM_002860.4:<br>c.2116A>G    | p.(Thr706Ala)         | M            | AD/AR               | 0.000001859     |
| 9       | LTBP2    | NM_000428.3:<br>c.848G>T     | p.(Ser283Ile)         | F            | AR                  | 0.000001286     |
| 9       | COL4A1   | NM_001845.6:<br>c.2277C>A    | p.(Ser759Arg)         | F            | AD                  | 0.00001487      |
| 9       | B3GALT6  | NM_080605.4:<br>c.588dup     | p.(Arg197AlafsTer246) | F            | AR                  | 0.0001448       |
| 10      | B3GALT6  | NM_080605.4:<br>c.220A>C     | p.(Ser74Arg)          | NA           | AR                  | 0               |
| 10      | PKD1     | NM_001009944.2:<br>c.7148G>T | p.(Arg2383Leu)        | NA           | AD                  | 0               |
| 12      | FBN2     | NM_001999.4:<br>c.8536C>T    | p.(Arg2846Cys)        | M            | AD                  | 0.00001673      |
| 12      | NOTCH1   | NM_017617.5:<br>c.1505A>G    | p.(Asn502Ser)         | F            | AD                  | 0.000003105     |
| 15      | COL9A3   | NM_001853.4:<br>c.1208G>C    | p.(Gly403Ala)         | NA           | AD/AR               | 0.00001912      |

NA: not available; AD: autosomal dominant; AR: autosomal recessive; M: maternal, F: paternal

\*: sisters. \*\*: for case 6 only maternal DNA sample was available. The test excluded the maternal inheritance but can not distinguish between paternal or de novo origin.

## Supplementary Material

**Table S3.** Candidate genes and novel candidate genes

| Case ID | Gene    | CG / NCG | Nucleotide variant           | Amino acid variant | Family study |
|---------|---------|----------|------------------------------|--------------------|--------------|
| 8       | TSR1    | CG       | NM_018128.5:<br>c.1061C>T    | p.(Ser354Phe)      | M            |
| 9       | TLN1    | CG       | NM_006289.4: c.5881-<br>7T>C | p.?                | F            |
| 5       | SMAD6   | CG       | NM_005585.5:<br>c.106G>A     | p.(Asp36Asn)       | F            |
| 8       | SBNO1   | NCG      | NM_001167856.2:c.64<br>1C>T  | p.(Ser214Phe)      | de novo      |
| 8       | SHANK2  | NCG      | NM_012309.5:<br>c.5047G>A    | p.(Gly1683Ser)     | de novo      |
| 8       | COL14A1 | NCG      | NM_021110.4:<br>c.847C>T     | p.(Arg283Cys)      | de novo      |
| 9       | MCHR2   | NCG      | NM_001040179.2:<br>c.642G>T  | p.(Leu214Phe)      | de novo      |
| 11      | DROSHA  | NCG      | NM_013253.5:c.2317G<br>>A    | p.(Val773Ile)      | de novo      |
| 12      | SUPV3L1 | NCG      | NM_003171.5:<br>c.196C>T     | p.(Pro66Ser)       | de novo      |

M: maternal, F: paternal; CG: candidate gene (SCAD associated candidate genes already described in literature); NCG: novel candidate gene (SCAD associated candidate genes identified in our study)

## Supplementary Material

**Table S4.** FRAXA results.

| Case ID                                                     | Sex | *CGG repeats at 5'-UTR<br>FMR1 gene |
|-------------------------------------------------------------|-----|-------------------------------------|
| 1                                                           | F   | 19-31                               |
| 2                                                           | F   | 30-32                               |
| 3                                                           | F   | 27-32                               |
| 4                                                           | F   | 25-30                               |
| 5                                                           | F   | 31-32                               |
| 6                                                           | F   | 21-33                               |
| 7                                                           | F   | 33-42                               |
| 8*                                                          | F   | 32-55                               |
| 9                                                           | F   | 13-31                               |
| 10                                                          | F   | 30-31                               |
| 11                                                          | M   | 30                                  |
| 12                                                          | F   | 31-32                               |
| 13                                                          | F   | 29-31                               |
| 14                                                          | F   | 30-31                               |
| 15*                                                         | F   | 32-55                               |
| *Normal alleles (< 45 CGG);Intermediate allele (45-54 CGG); |     |                                     |
| Premutation allele (55-200 CGG), Full mutation (> 200 CGG)  |     |                                     |
| *: sisters                                                  |     |                                     |

## *Family tree*

### *Legend*

|                                                    |                                                                                     |
|----------------------------------------------------|-------------------------------------------------------------------------------------|
| SCAD                                               | 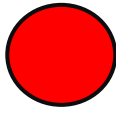   |
| SCAD + ICA dissection                              |    |
| Cerebral aneurysm                                  |    |
| Abdominal aortic aneurysm                          |  |
| Thoracic aortic ectasia                            |  |
| Aortic dissection type A (Stanford classification) |  |
| SCD                                                |  |
| Cavernous angioma                                  |  |
| SCAD + anterior branch of VA dissection            |  |

SCAD: spontaneous coronary artery dissection

ICA: internal carotid artery

VA: vertebral artery

SCD: sudden cardiac death

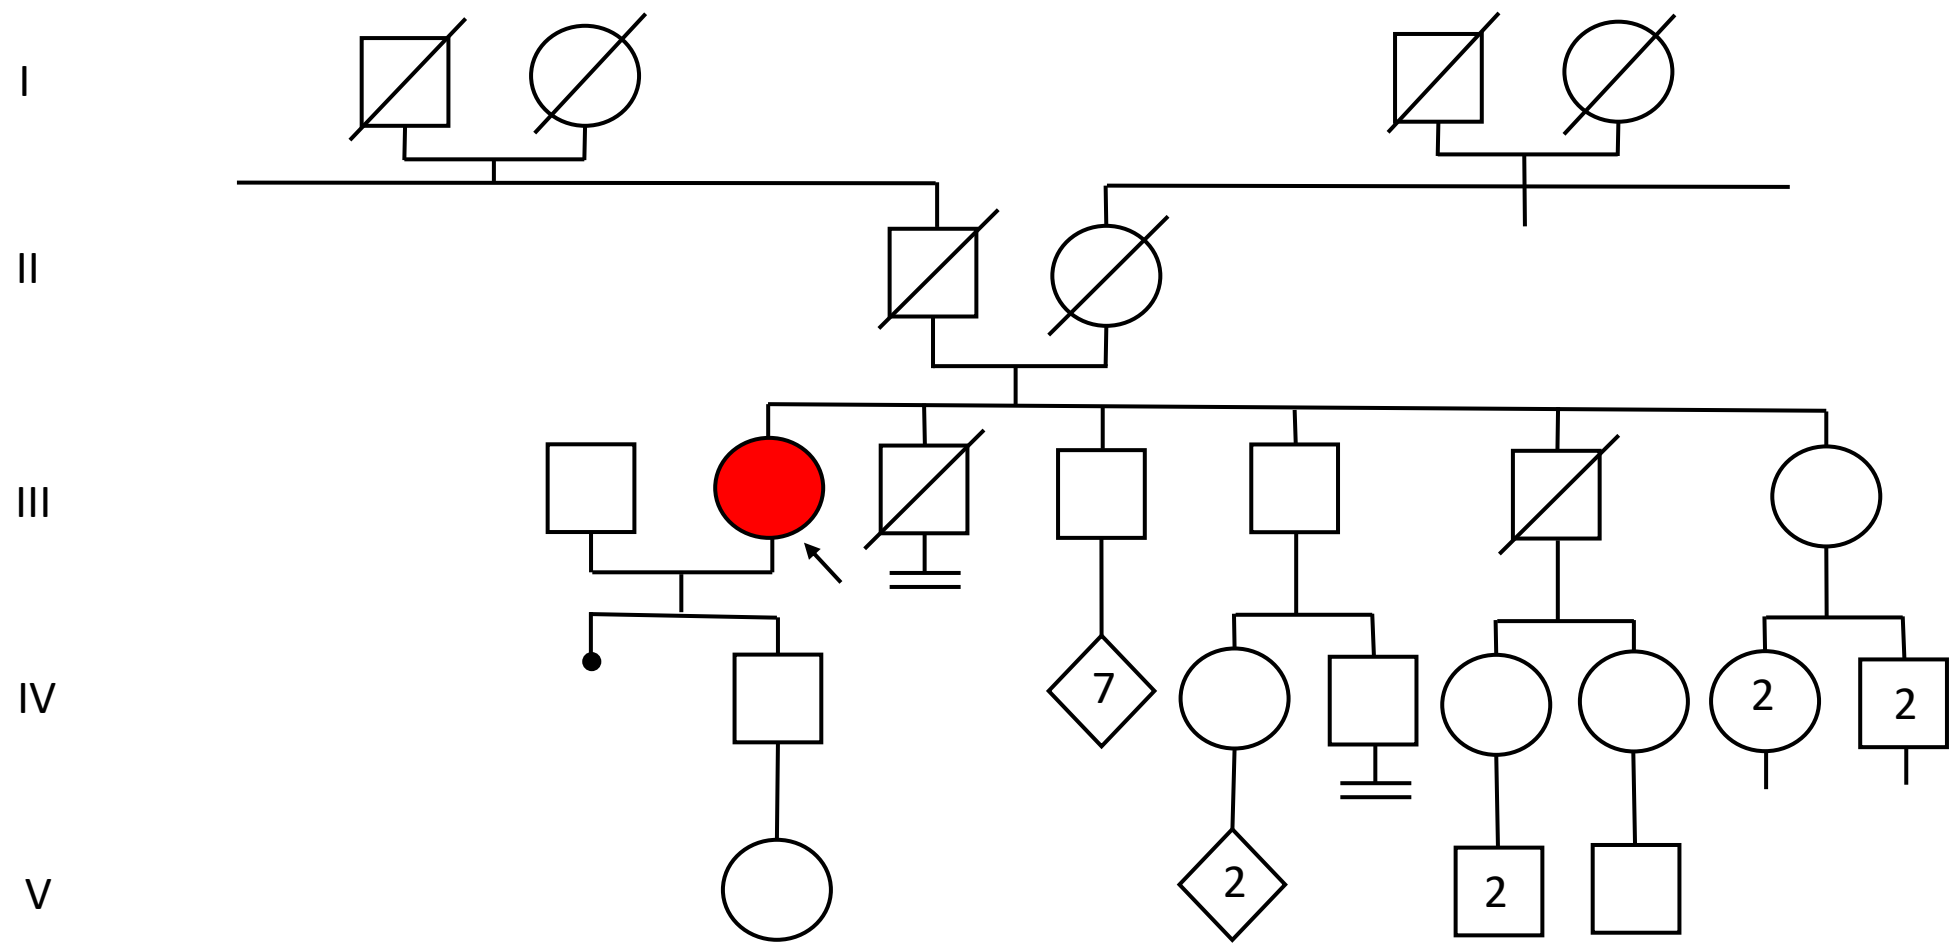

CASE ID 2  
 COL1A2:p.(Arg224Cys)

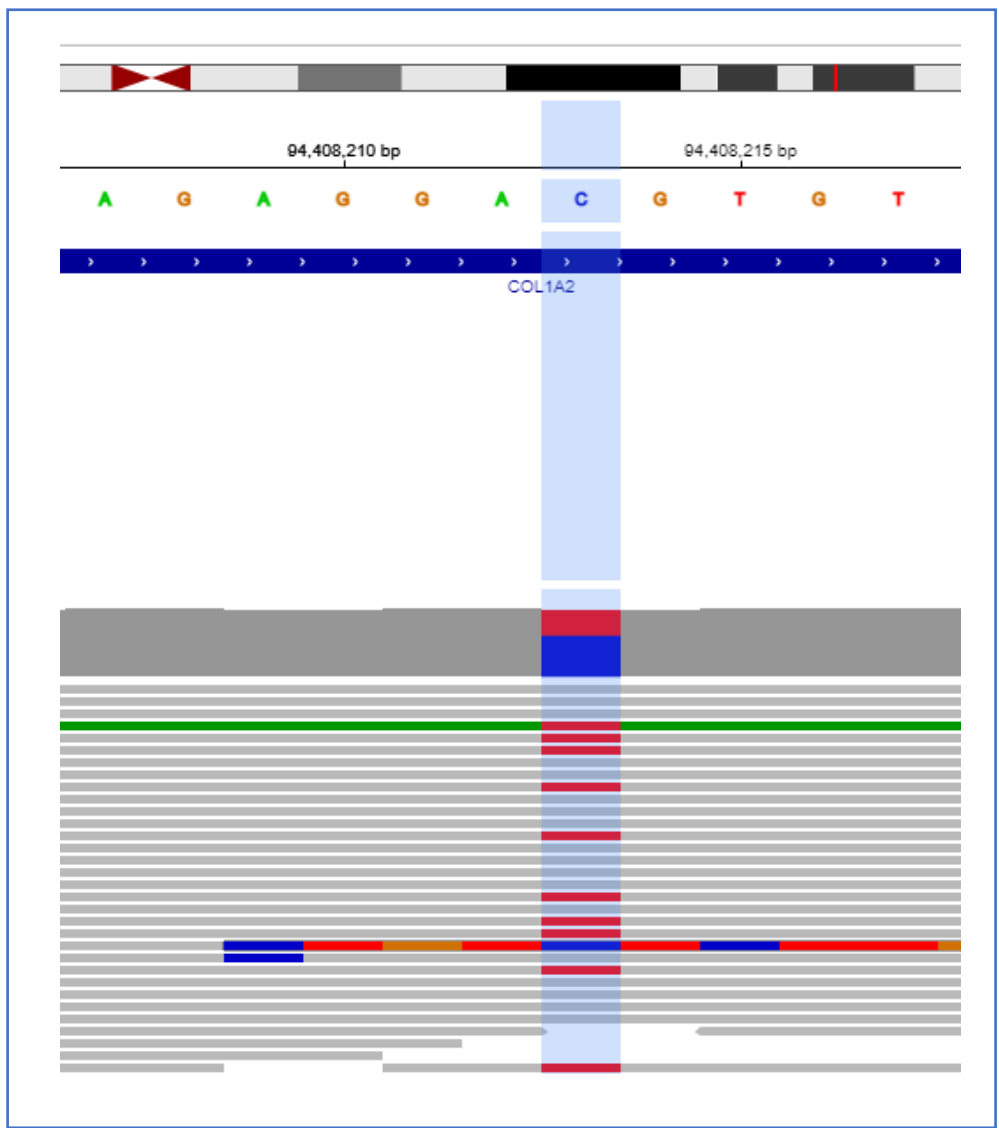

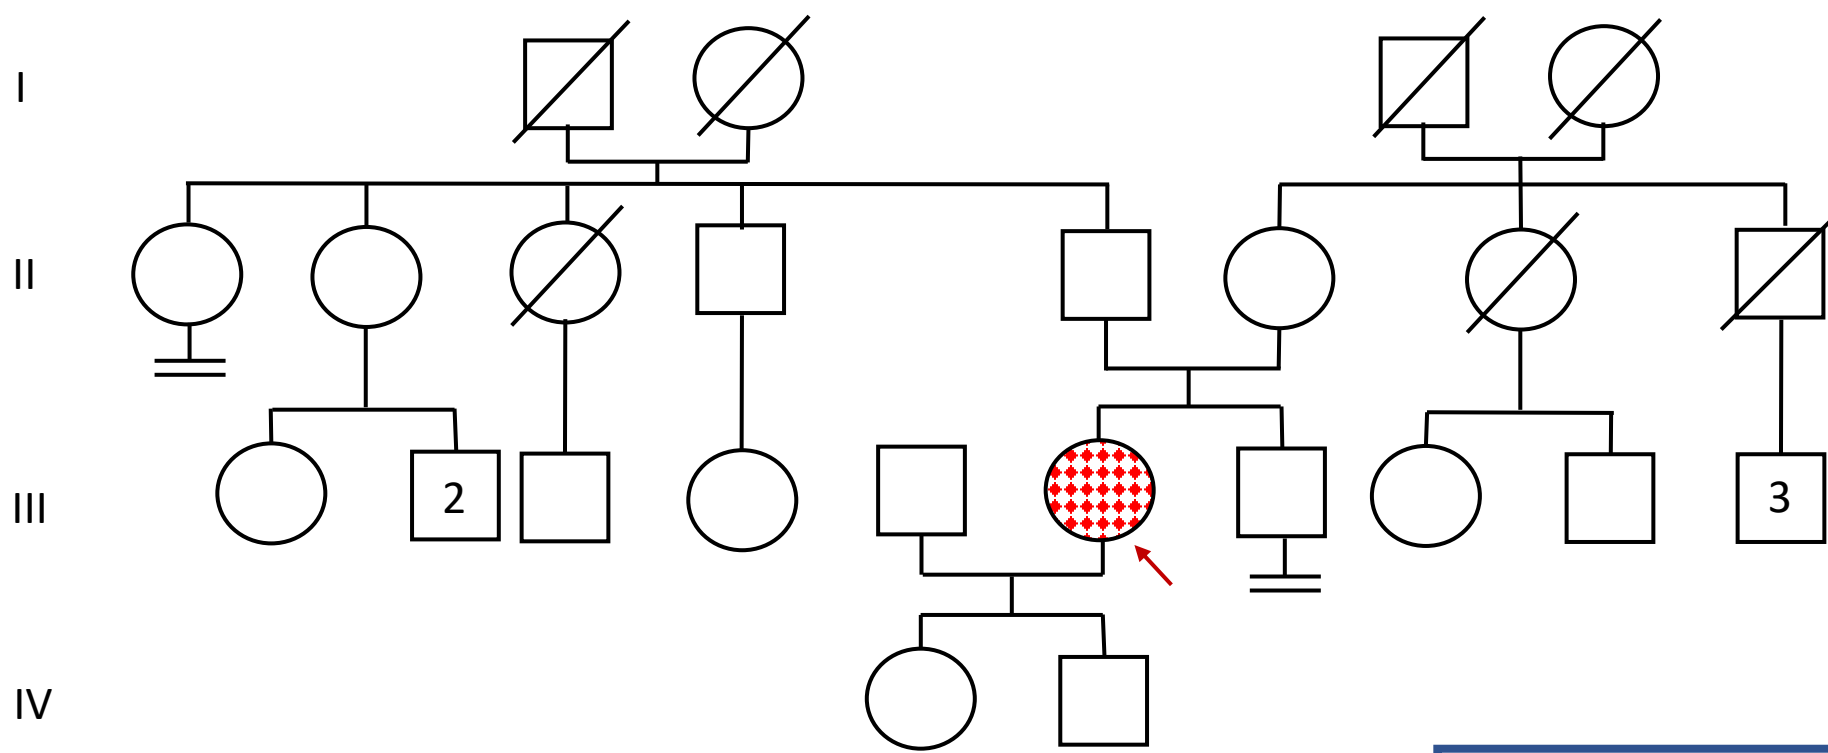

CASE ID 7

COL3A1:p.(Tyr39Ter)

De novo

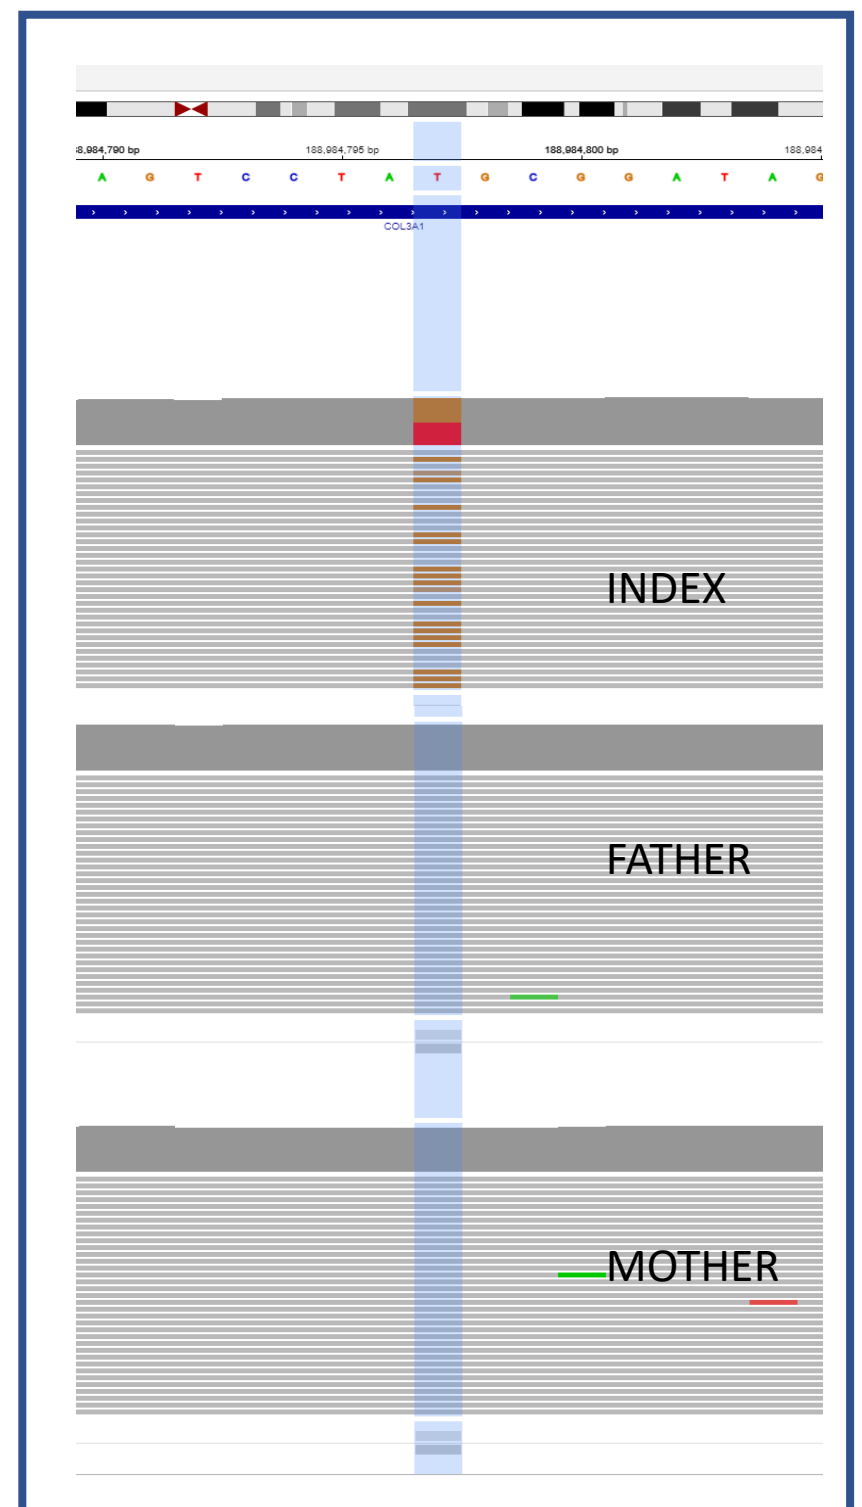

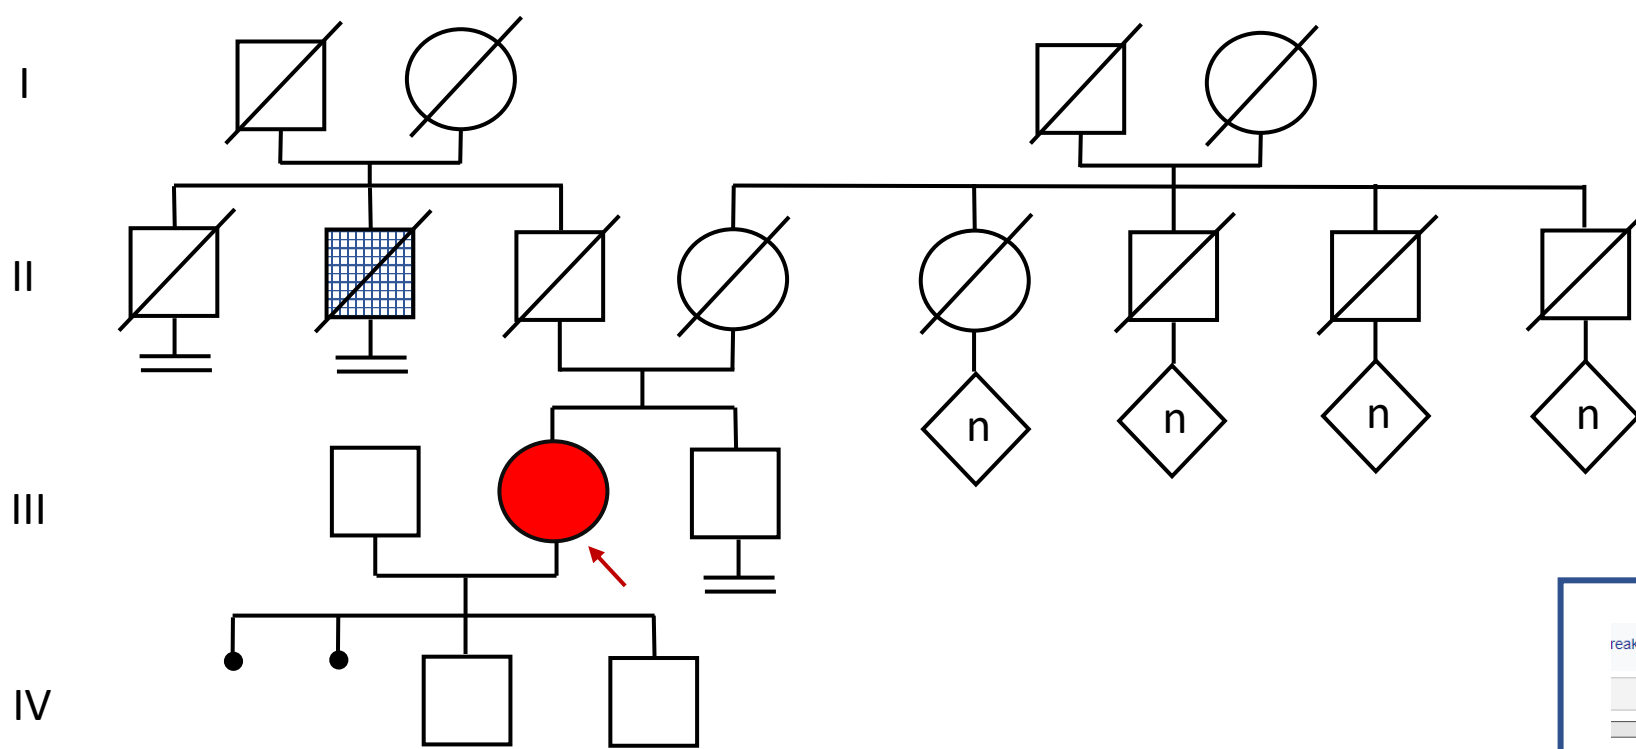

CASE ID 4  
 SMAD3: p.(Pro10Ala)

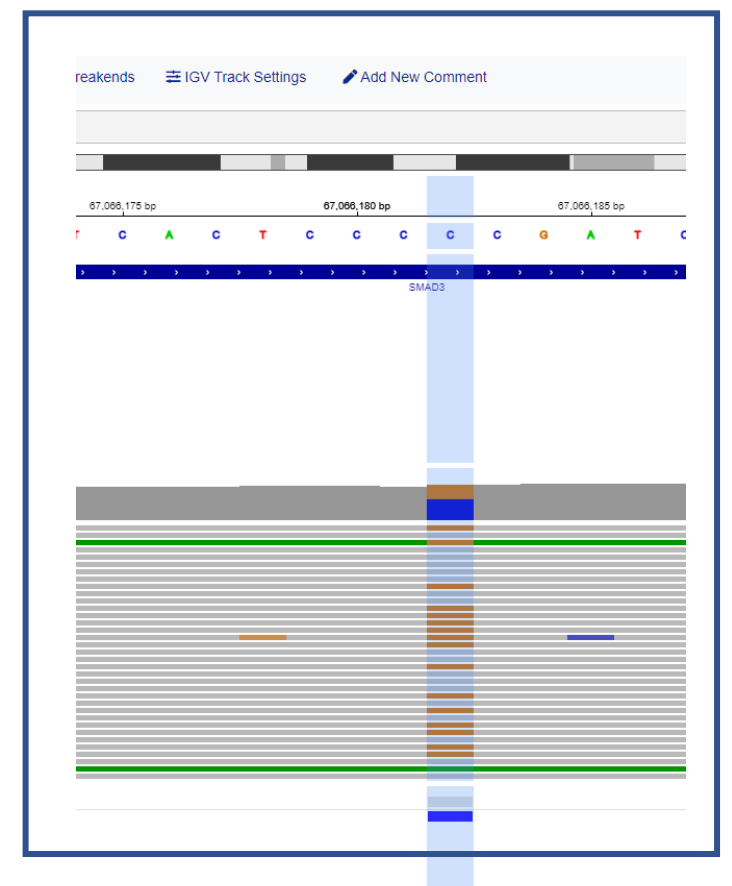



## CASE ID 8 AND CASE ID 15

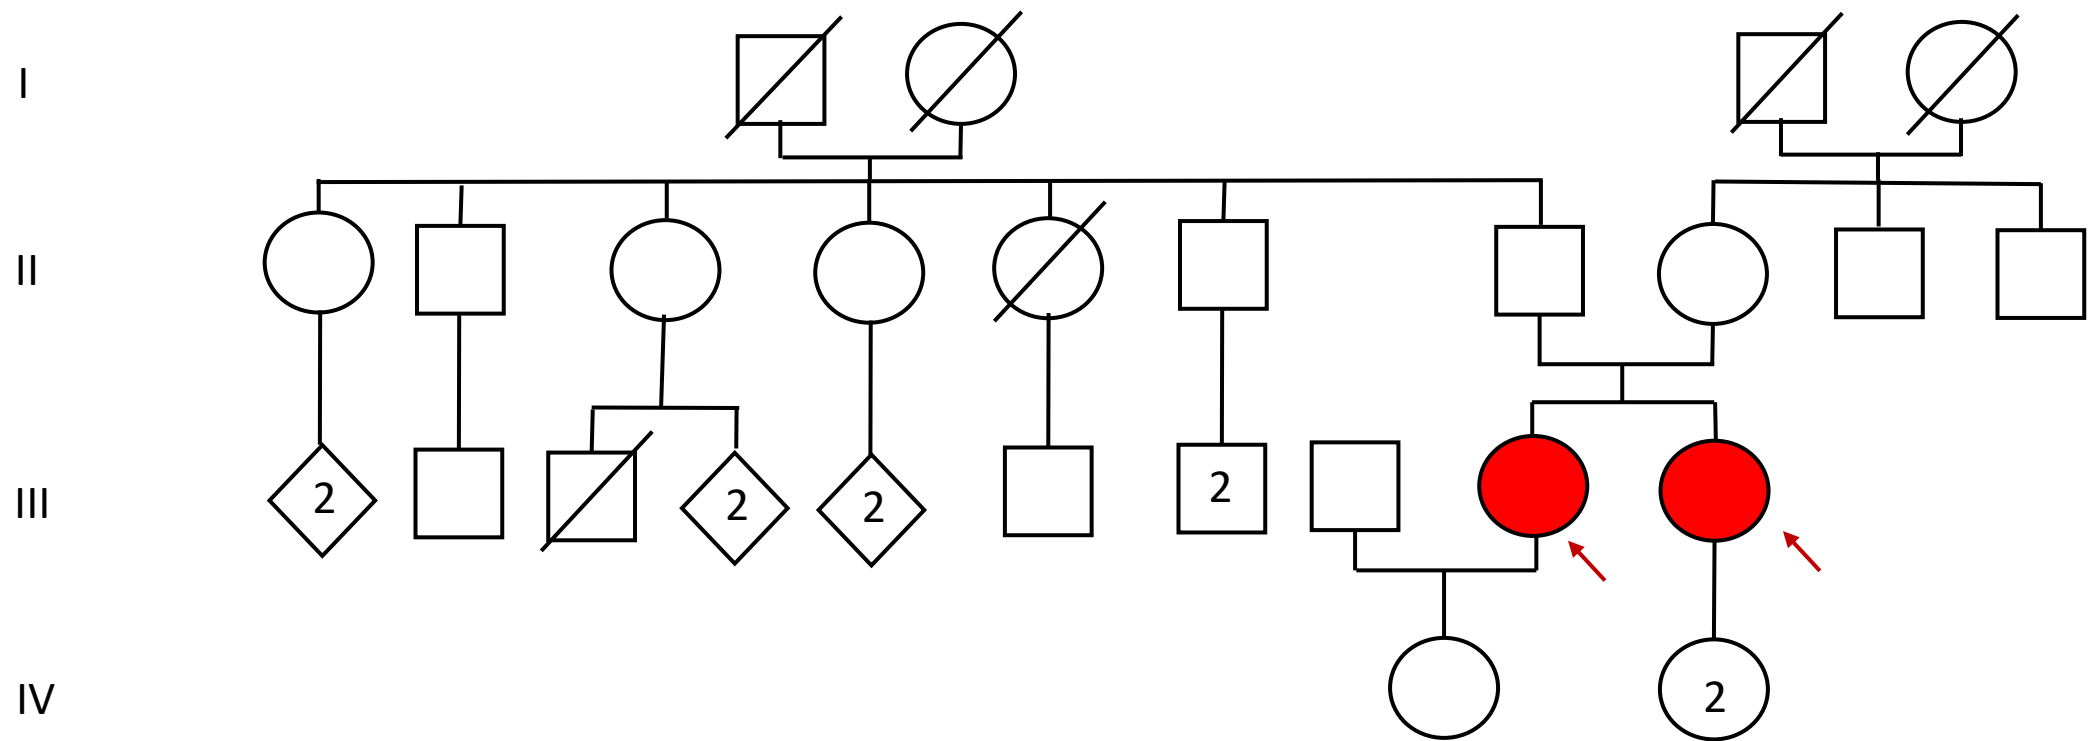

CASE ID 8 (III 10)

CASE ID 15 (III 9)

|          |                |          |        |               |          |
|----------|----------------|----------|--------|---------------|----------|
| COL5A2   | c.4354-21C>T   | paternal | COL5A2 | c.4354-21C>T  | paternal |
| COL5A1   | p.(Tyr234His)  | maternal | COL5A1 | p.(Tyr234His) | maternal |
| MTHFR    | c.*2809T>C     | maternal | MTHFR  | c.*2809T>C    | maternal |
| TSR1     | p.(Ser354Phe)  | maternal | COL9A3 | p.(Gly403Ala) | paternal |
| ALDH18A1 | p.(Thr706Ala)  | maternal |        |               |          |
| COL14A1  | p.(Arg283Cys)  | de novo  |        |               |          |
| SHANK2   | p.(Gly1683Ser) | de novo  |        |               |          |
| SBN01    | p.(Ser214Phe)  | de novo  |        |               |          |

CASE ID 12

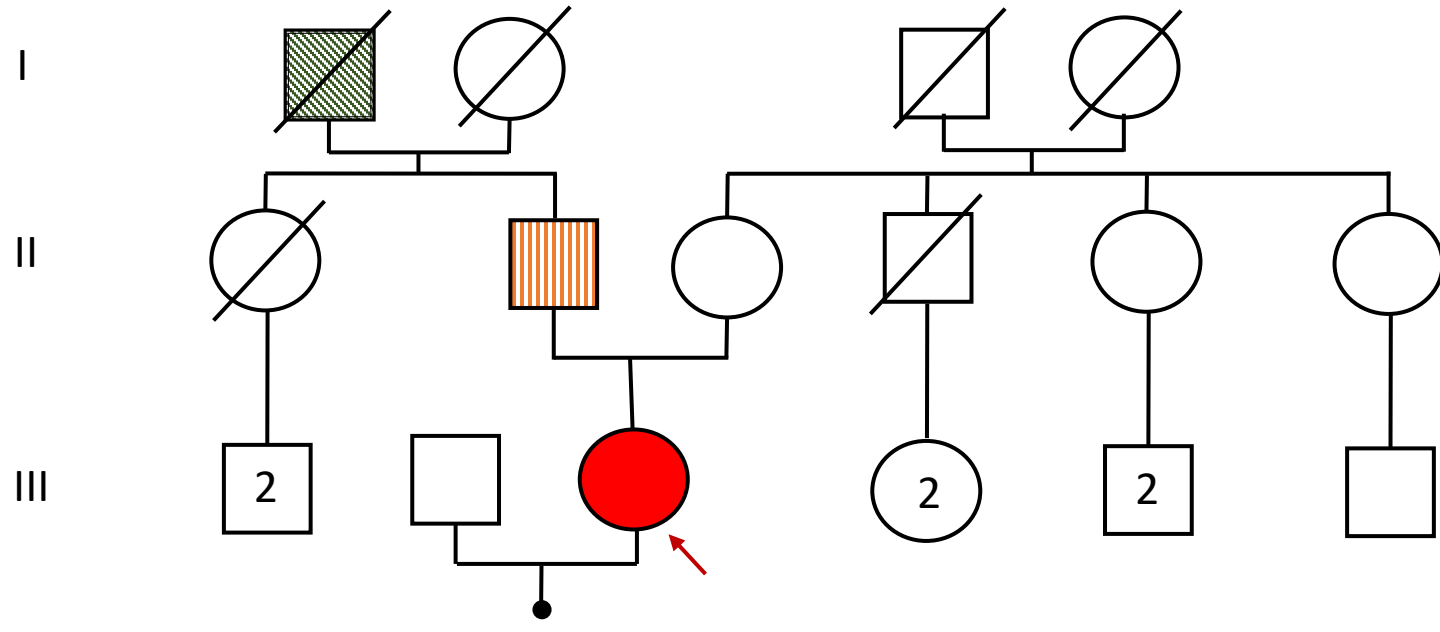

CASE ID 14

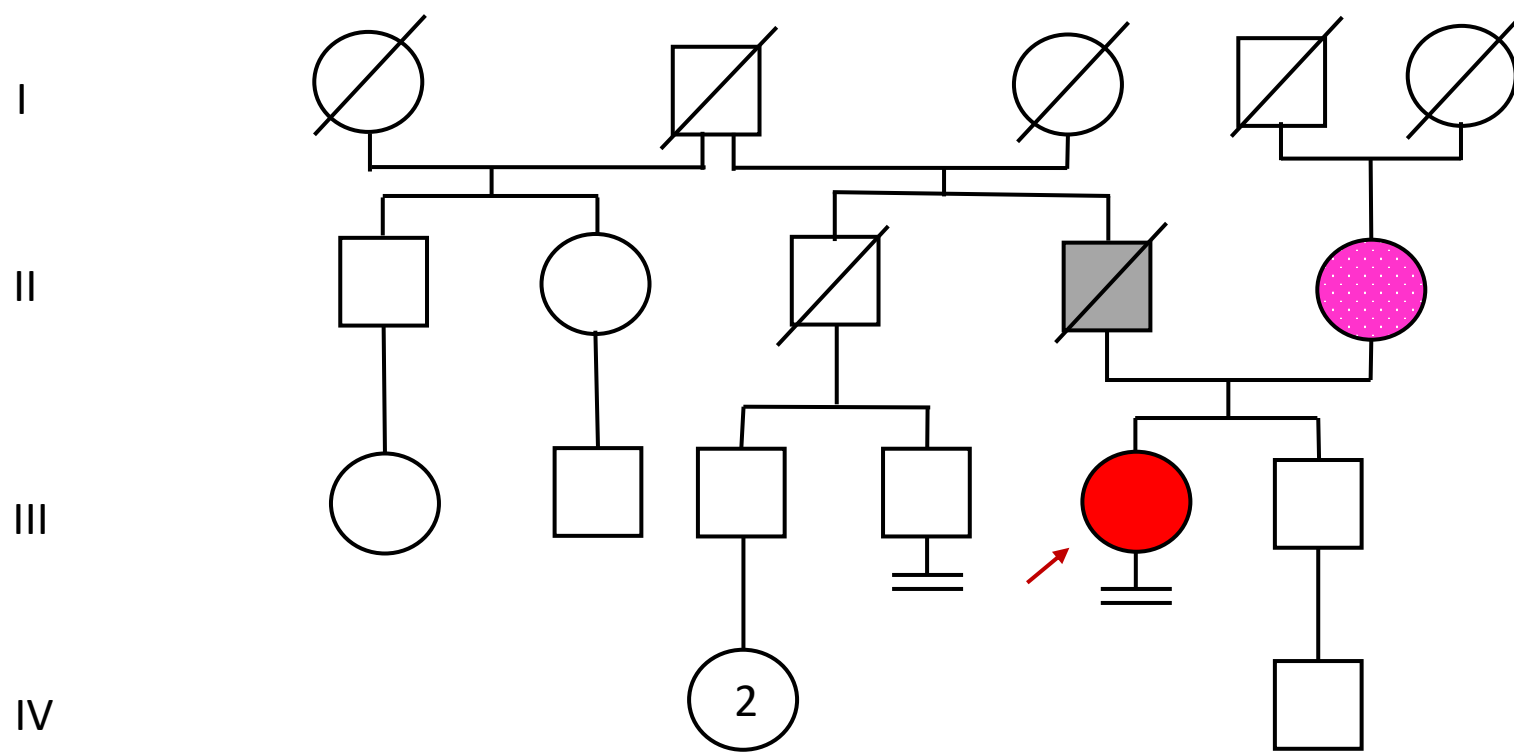

CASE ID 9

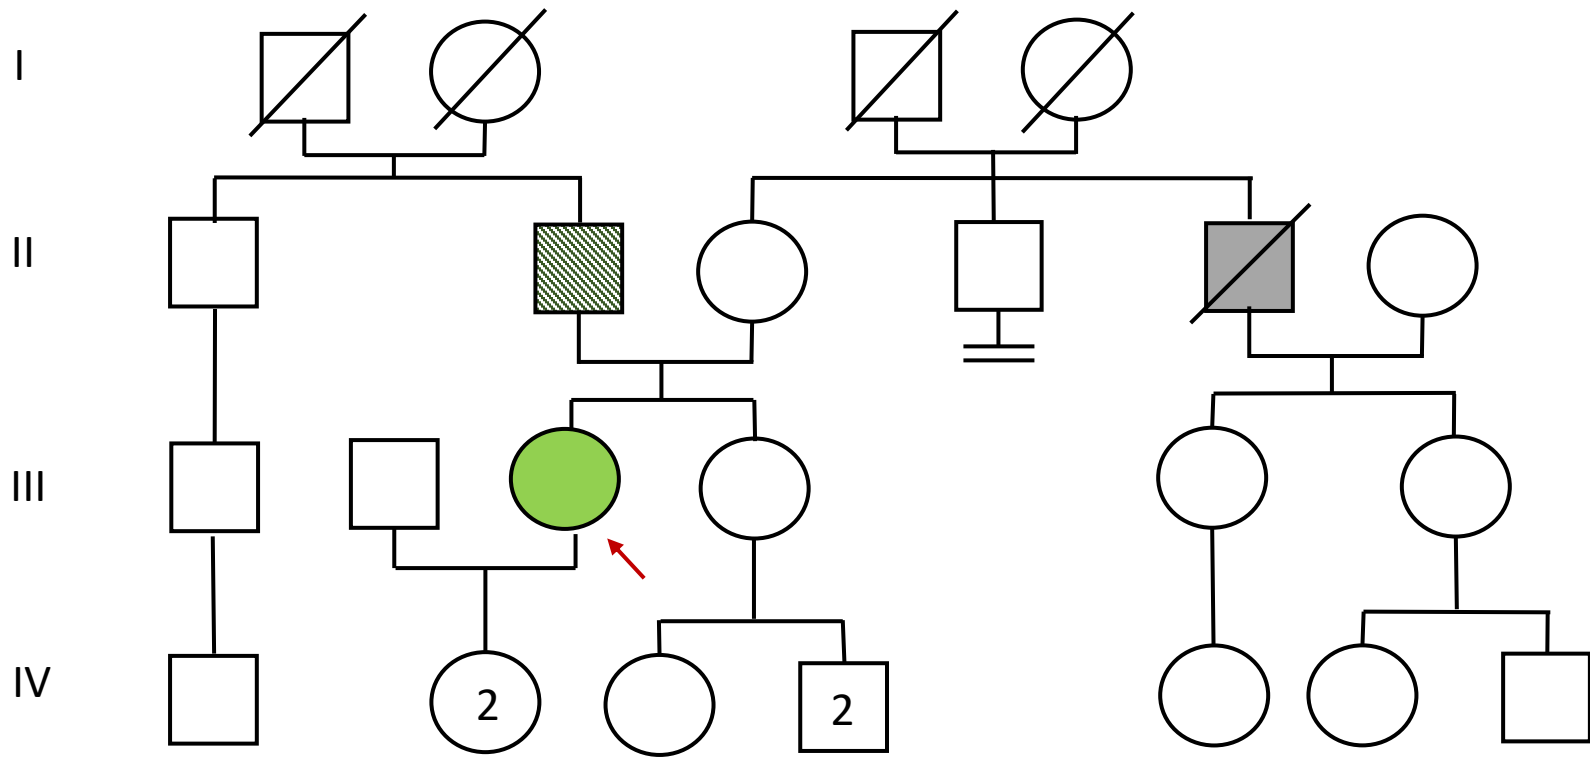

CASE ID 3

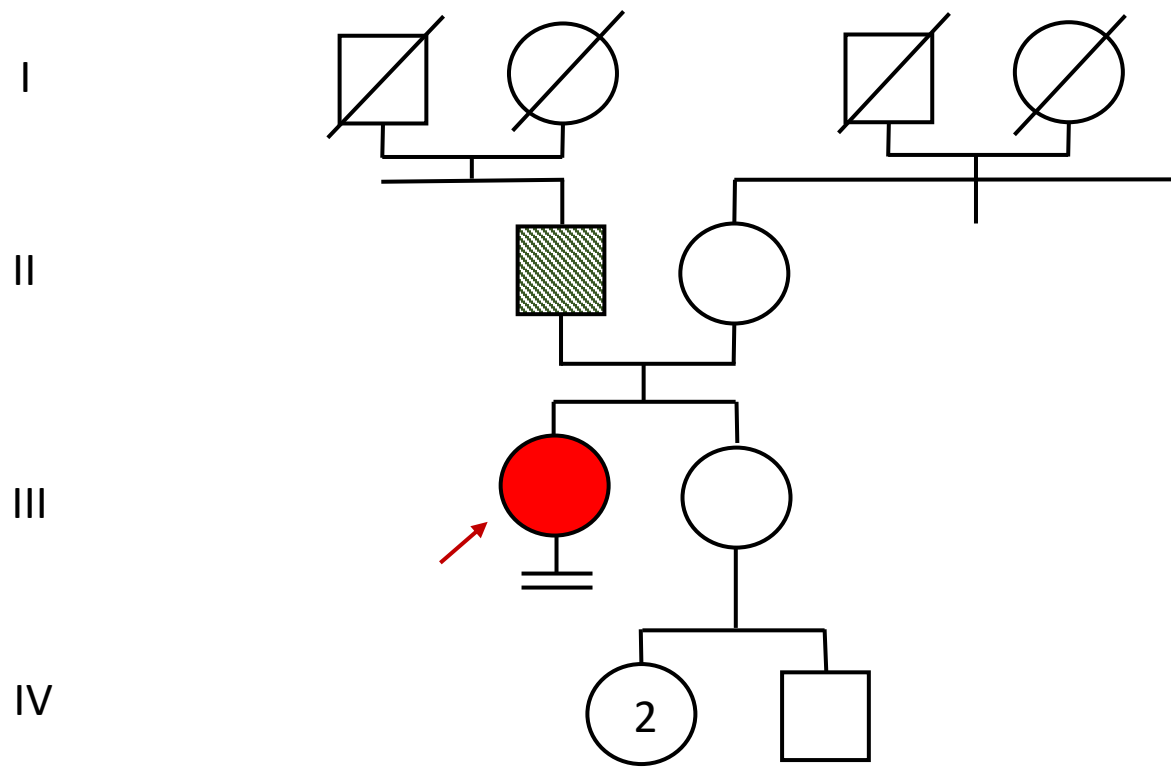

CASE ID 1

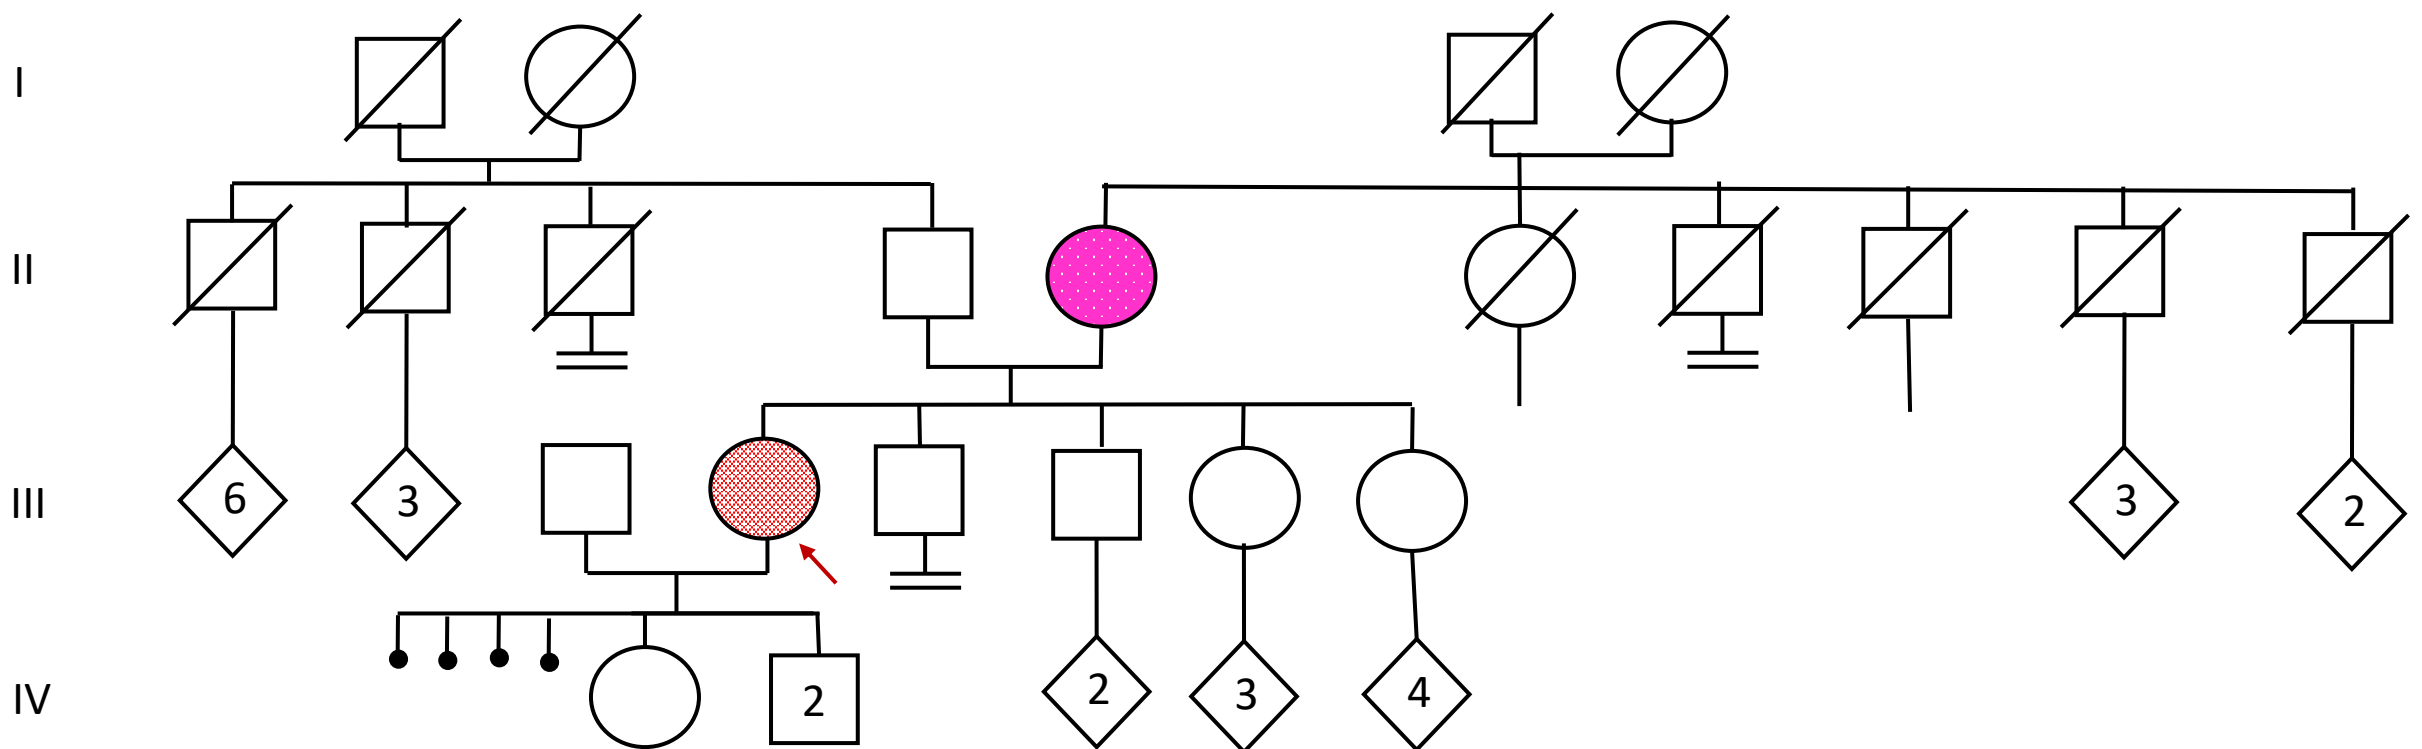

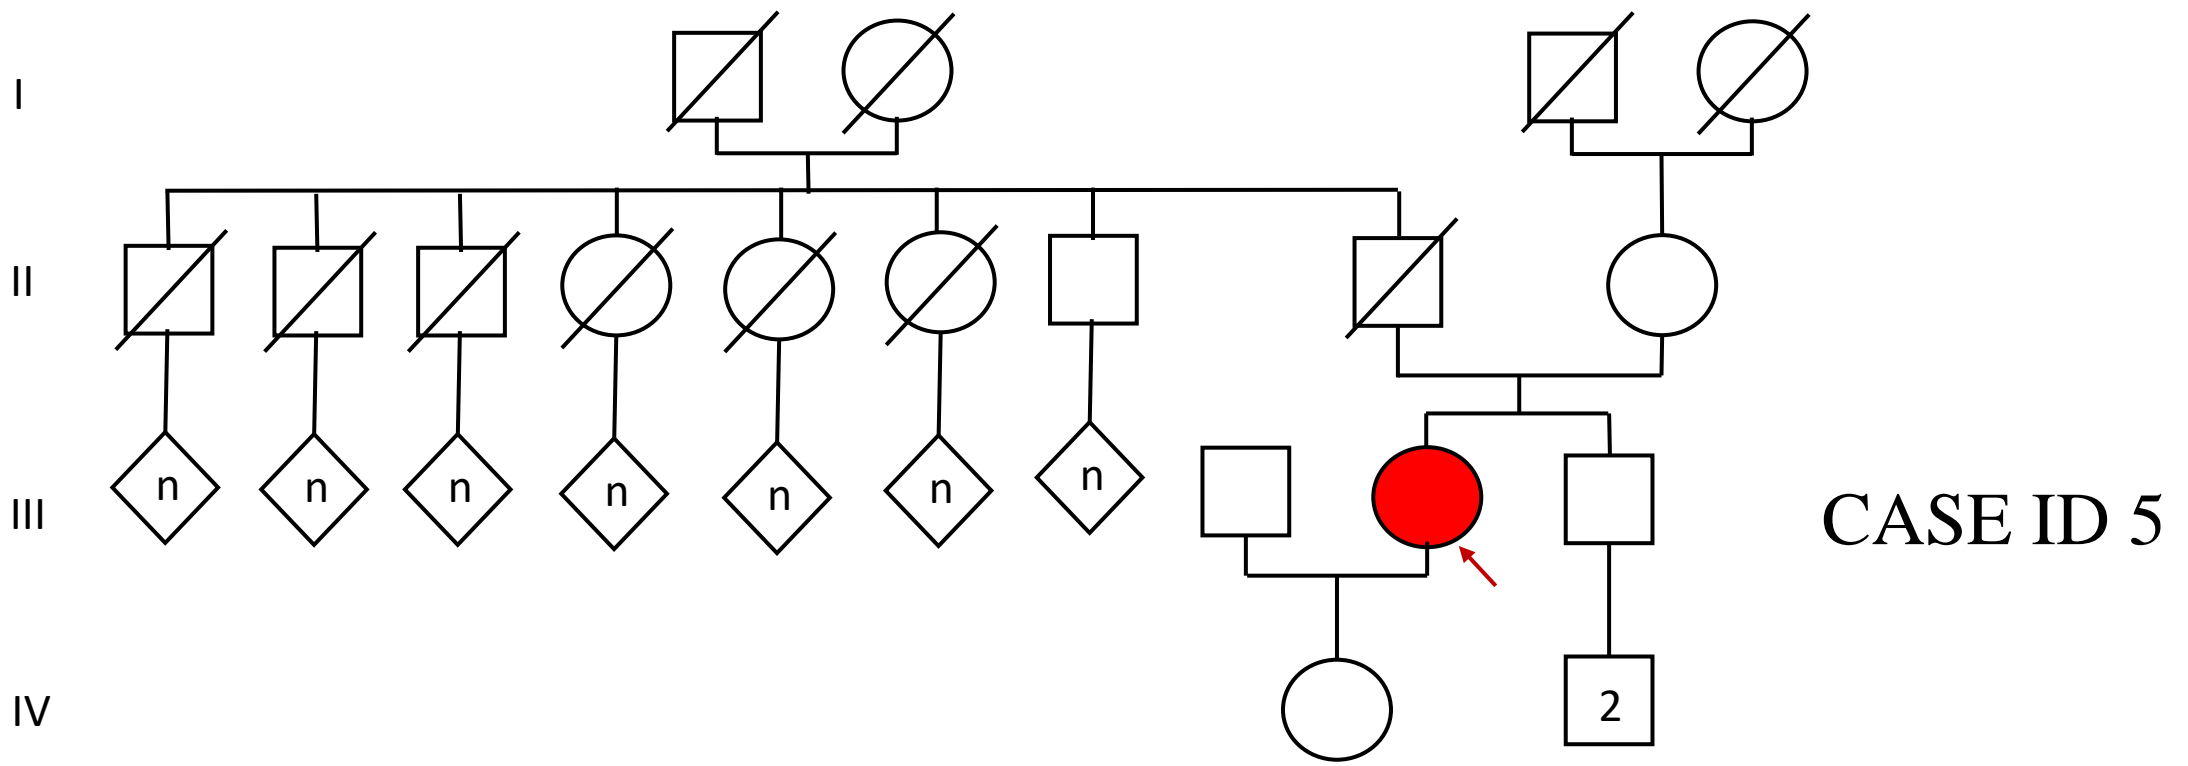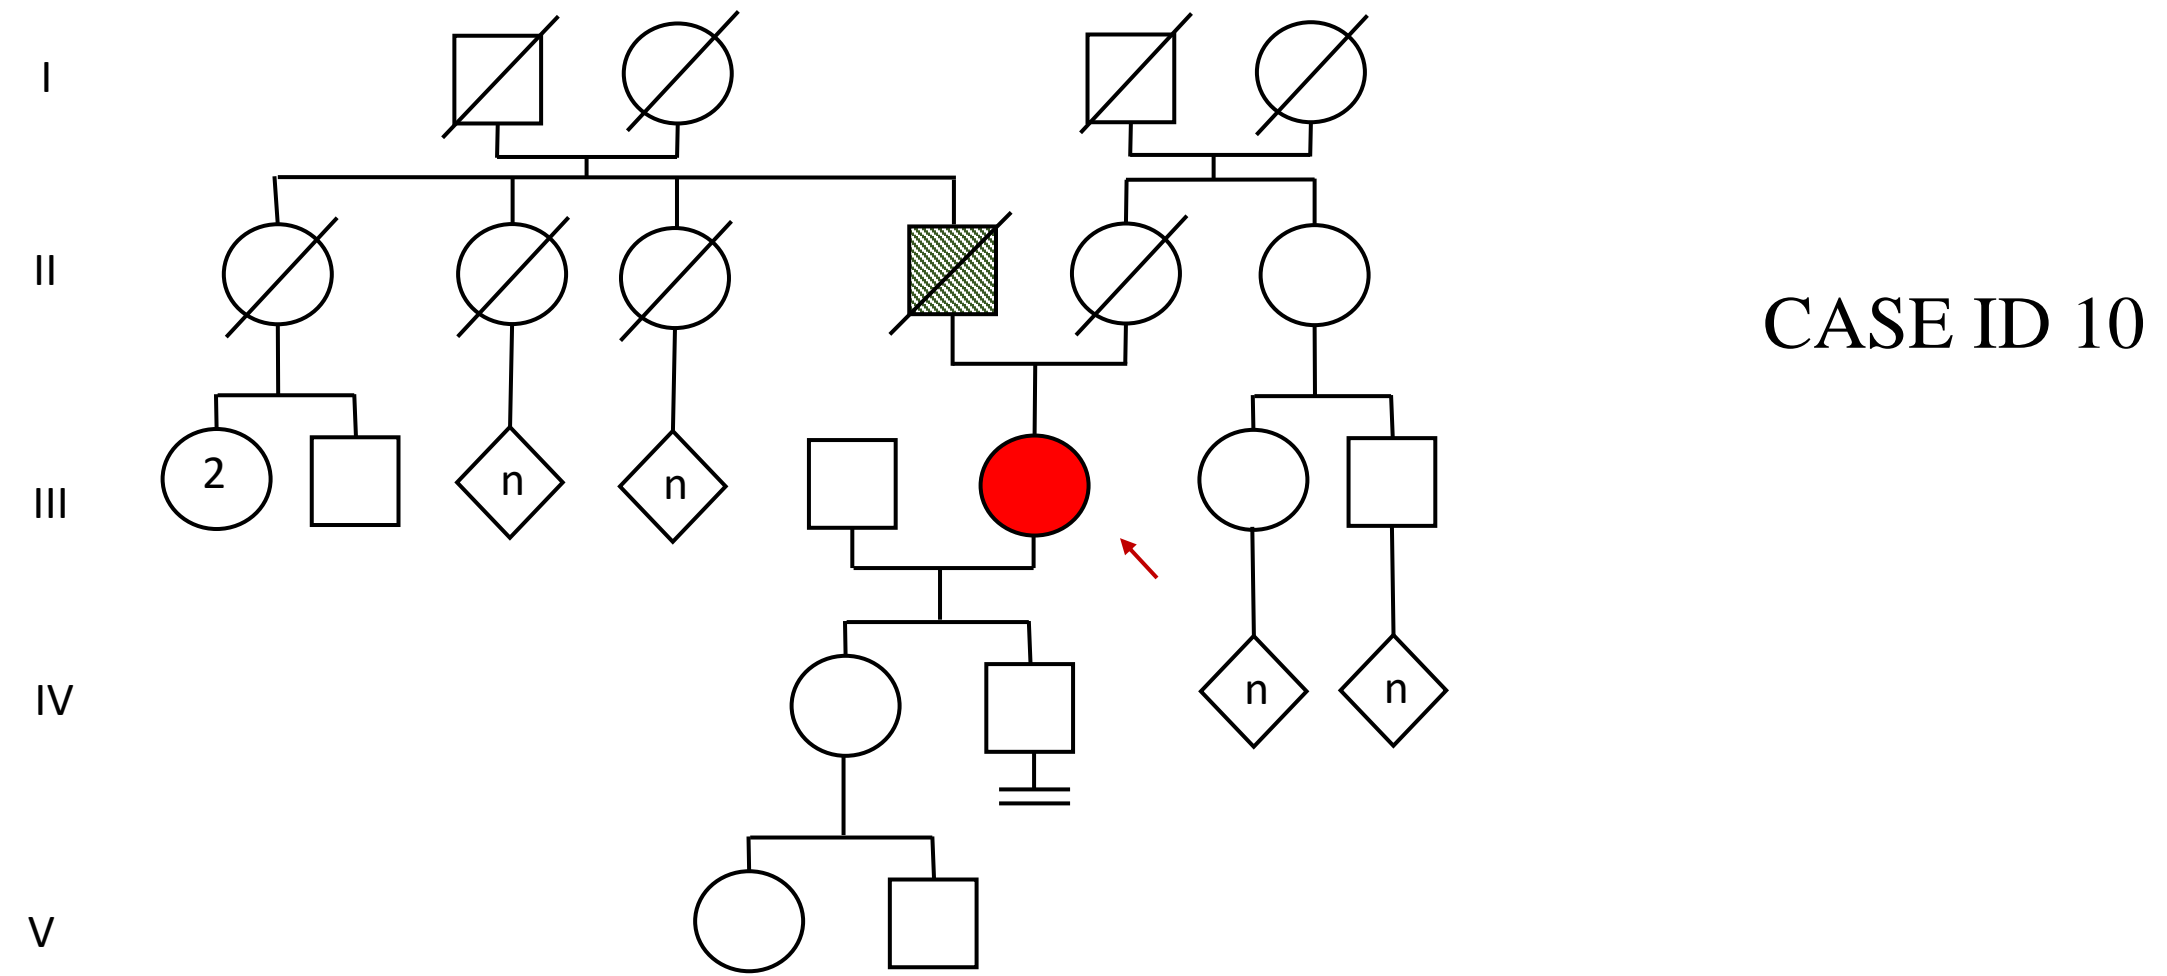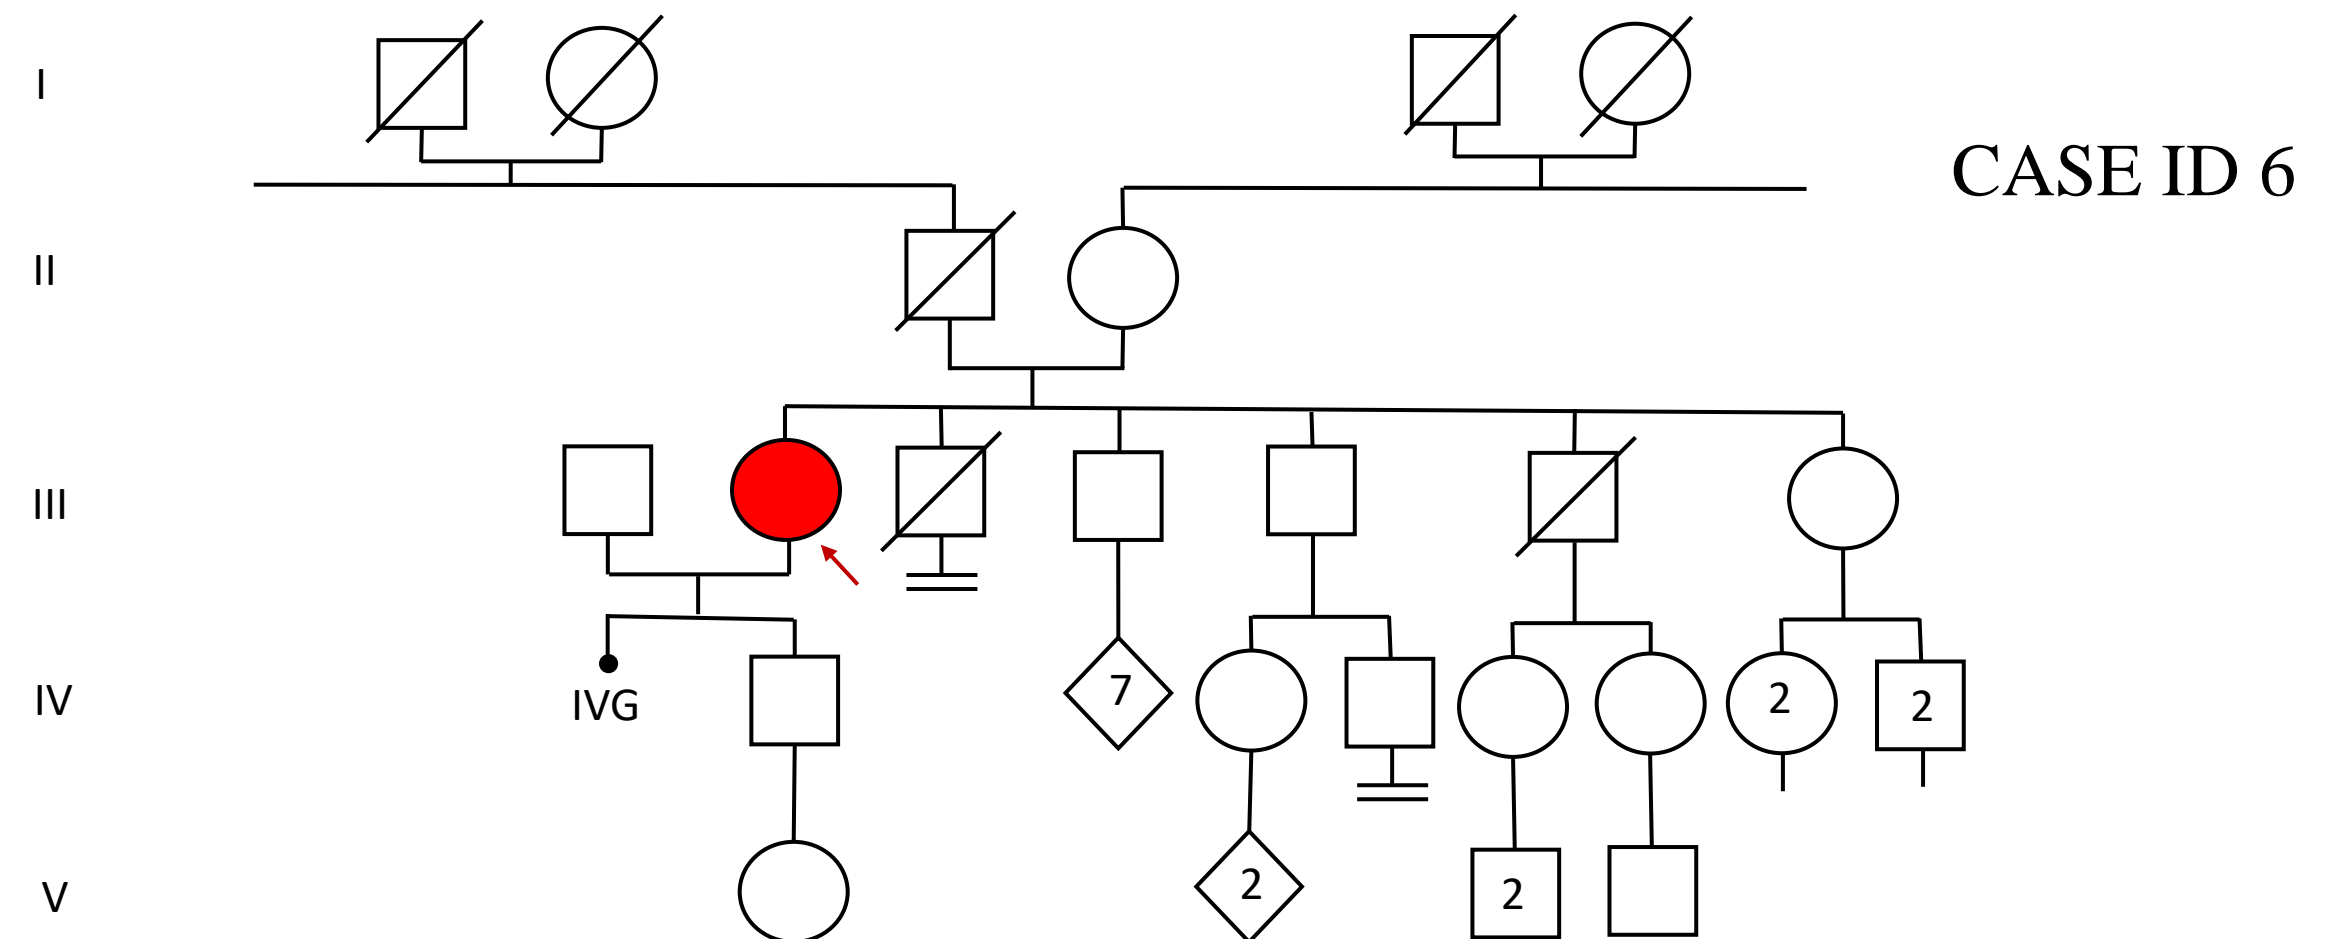

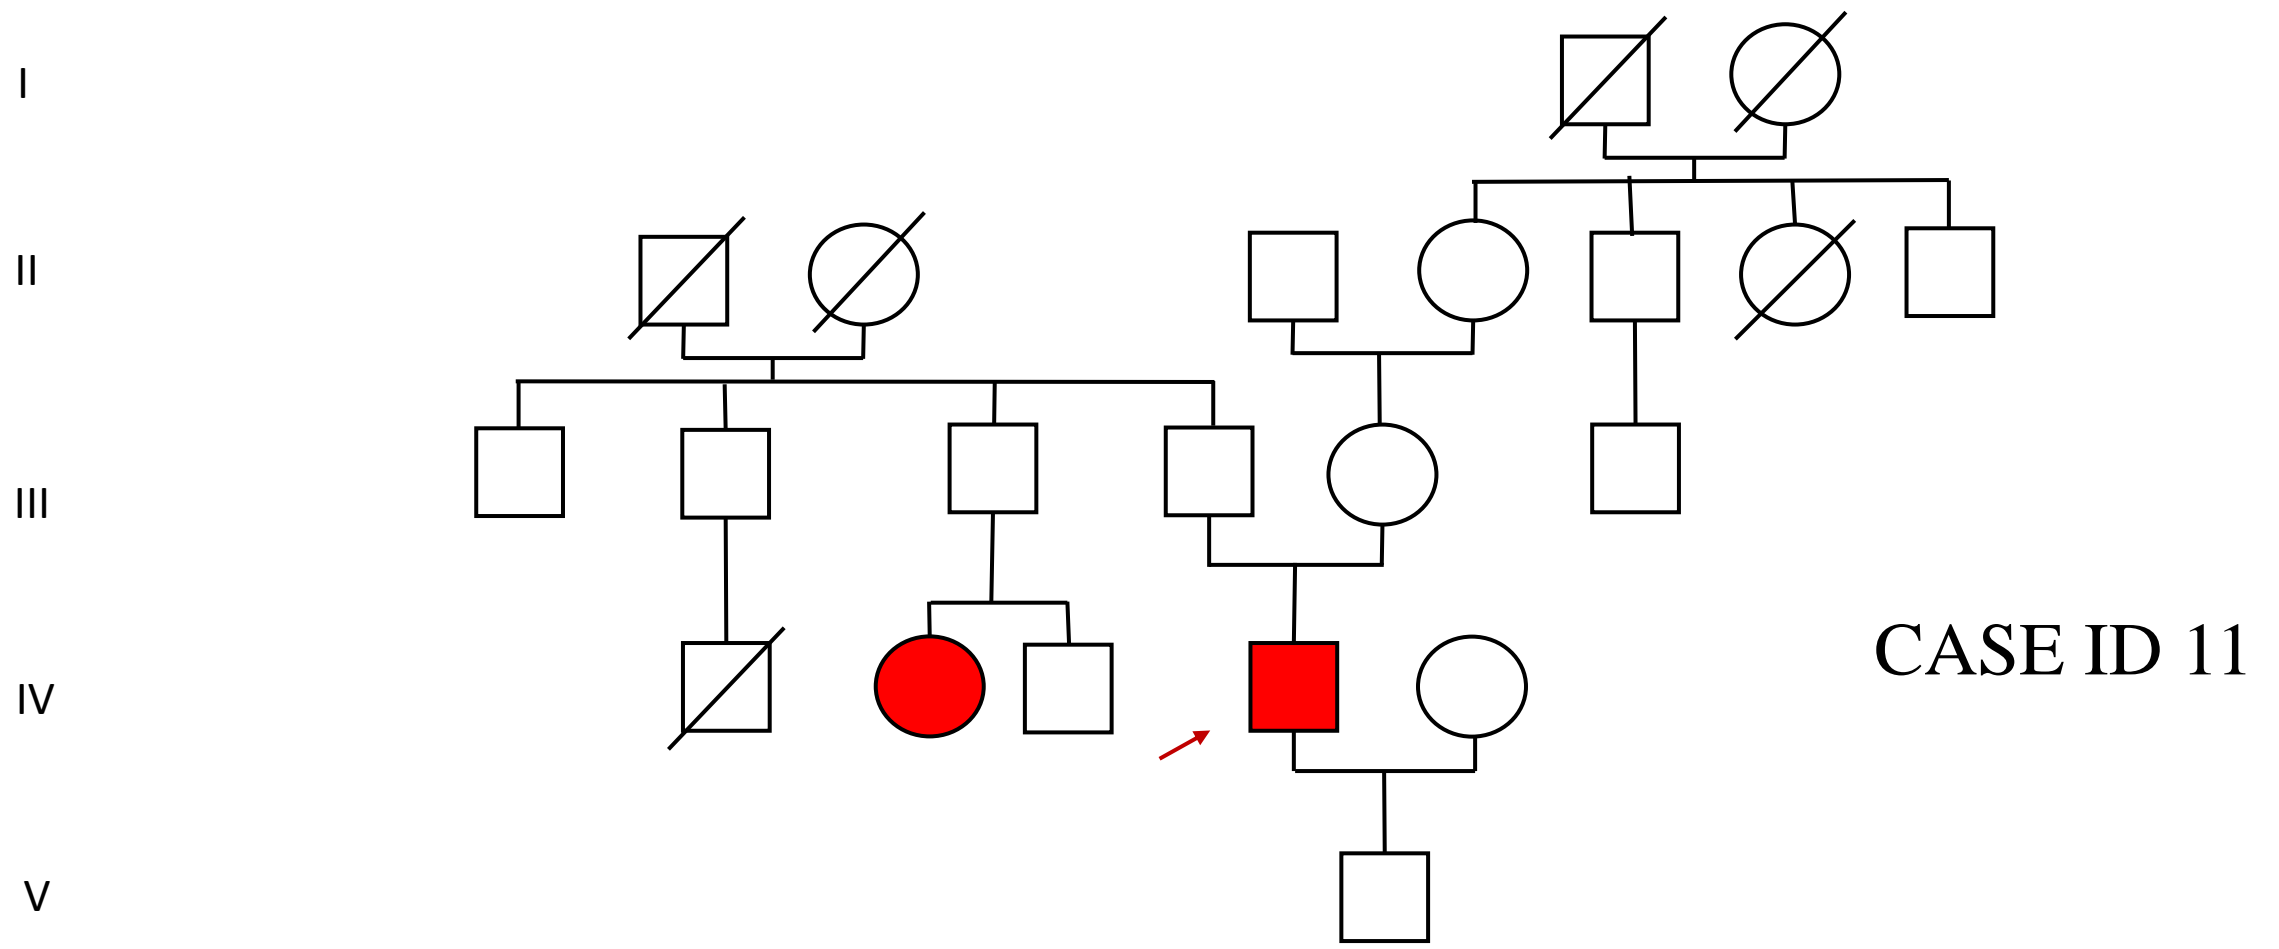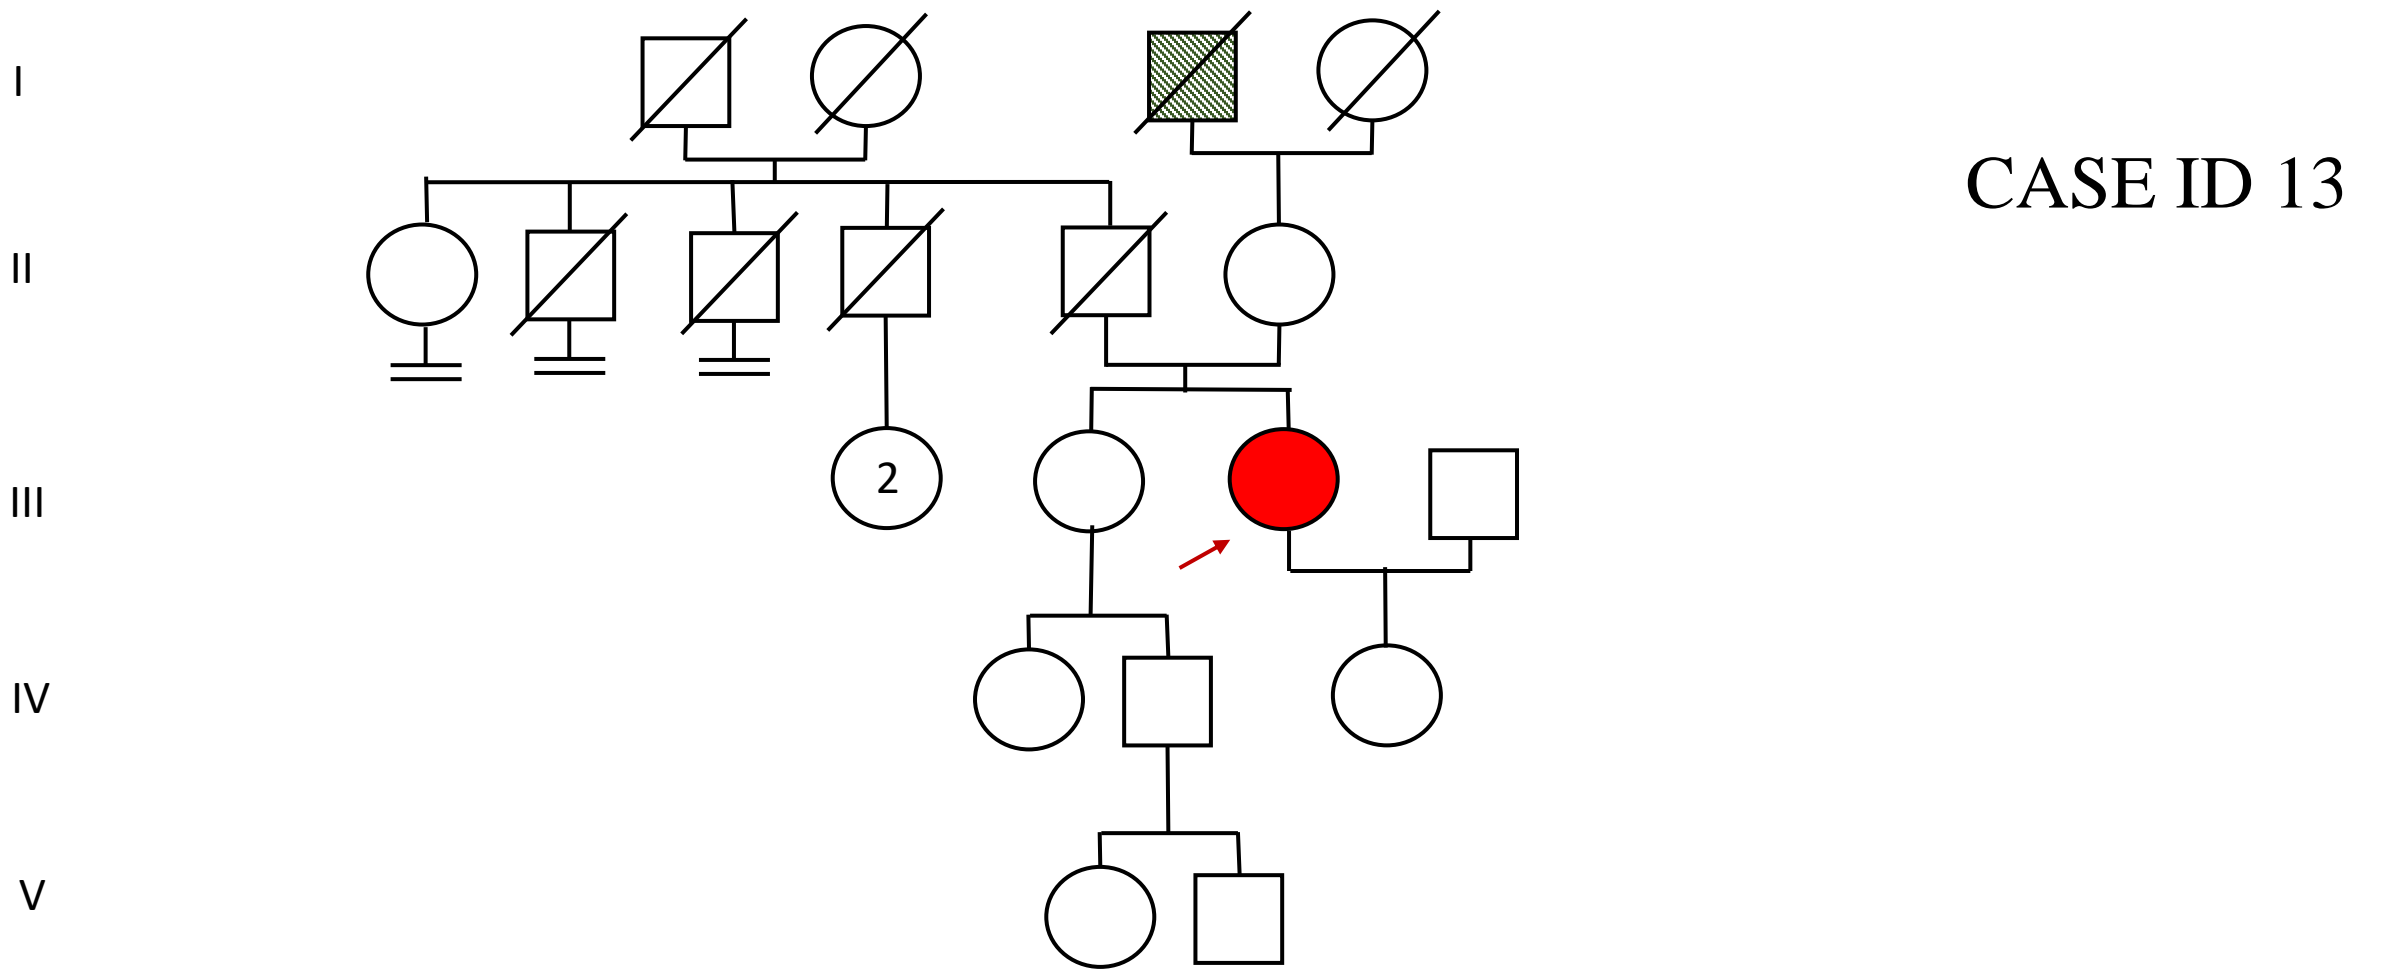

Supplement: Datasheet1.pdf [file Datasheet1.pdf]
